# Supplementary material for: Formation of paramagnetic metallacyclobutadienes by reaction of diaminoacetylenes with molybdenum alkylidyne complexes
Source: Royal Society of Chemistry journal article supplement (doi:10.1039/c7dt00305f), 2017-01-01
Supplement: c7dt00305f2.pdf [file c7dt00305f2.pdf]

## Supporting Information

### Contents

|                                                         |     |
|---------------------------------------------------------|-----|
| Experimental Section.....                               | S2  |
| Additional experimental procedures .....                | S2  |
| X-ray crystal structure determinations .....            | S3  |
| NMR studies.....                                        | S5  |
| Variable temperature NMR spectroscopy of <b>4</b> ..... | S5  |
| NMR spectra of <b>4</b> at -29 °C .....                 | S7  |
| Stereoisomers of <b>4</b> .....                         | S9  |
| Variable temperature NMR spectroscopy of <b>5</b> ..... | S10 |
| Solid-state magnetic susceptibility studies.....        | S12 |
| Decomposition studies.....                              | S16 |
| Computational studies .....                             | S17 |
| References.....                                         | S20 |

## Experimental Section

### *Additional experimental procedures*

*Synthesis of bis(4-methylpiperidino)acetylene (2).* The literature protocol<sup>1</sup> was adapted as follows. A solution of <sup>n</sup>BuLi (2.5 M in hexane, 6.53 mL, 16.35 mmol, 1.1 equiv) was added dropwise to a stirred solution of 1,1-di(4-methylpiperidino)-2,2-dibromoethene (5.65 g, 14.86 mmol, 1 equiv) in hexane (60 mL), which resulted in the formation of a white precipitate (LiBr). After 30 min the excess <sup>n</sup>BuLi was quenched with dimethylformamide (1 mL), and the mixture was filtered over a pad of Celite® and washed with hexane (10 mL + 2 × 5 mL). The yellow filtrate was collected in a silylated flask and the volatiles were removed in high vacuum, affording a yellowish residue. After bulb-to-bulb distillation under low pressure (3 Pa) **2** was obtained as a colourless crystalline solid and stored in a silylated flask at –30 °C. Yield: 79% (2.57 g). The spectroscopic data are in agreement with the literature.<sup>1</sup>

*One-pot synthesis of bis(diethylamino)acetylene (3).* The literature protocols<sup>2,3</sup> were adapted as follows. To a precooled (–80 °C) solution of trichloroethylene (6.570 g, 50.0 mmol) in Et<sub>2</sub>O (50 mL) a solution of lithium diethylamide (3.954 g, 50.0 mmol, 1.0 equiv) in Et<sub>2</sub>O (50 mL) was carefully added dropwise over a period of 45 min. After addition was completed, the orange solution was stirred for 2 h and allowed to warm gradually to room temperature, leaving a turbid brown mixture. The mixture was cooled again to –80 °C and, under exclusion of light, a solution of lithium diethylamide (3.954 g, 50.0 mmol, 1.0 equiv) in Et<sub>2</sub>O (50 mL) was slowly added over a period of 45 min. The mixture was stirred for 1 h and allowed to warm gradually to 0 °C, resulting in a brown mixture. At this temperature, the solvent was partially removed (approx. 100 mL) at low pressure (besides the solvent, a yellow substance was collected in the cold trap that decomposes in contact with air). The deep maroon mixture was cooled to –80 °C again and, under exclusion of light, a solution of lithium diethylamide (4.349 g, 55.0 mmol, 1.1 equiv) in Et<sub>2</sub>O (50 mL) was slowly added over 45 min. The reaction mixture was then allowed to warm gradually to 0 °C and the solvent was partially removed (approx. 100 mL). The brown mixture was filtered through a Celite®-pad and washed with Et<sub>2</sub>O (4 × 5 mL). The solvent was removed at 0 °C and the brown residue was purified by bulb-to-bulb distillation (40–70 °C, 5 Pa) affording **3** as a pale yellow liquid. Yield: 48% (4.00 g). The spectroscopic data are in agreement with the literature.<sup>3</sup>

*Attempted metathesis of diphenylacetylene and the diaminoacetylene 2.* To a stirred solution of diphenylacetylene (18 mg, 100 μmol) and **2** (22 mg, 100 μmol) in C<sub>6</sub>D<sub>6</sub> (0.6 mL) was added 1 mol% of **1** (0.8 mg, 1 μmol), resulting in an immediate colour change to red. The reaction mixture was analysed by NMR spectroscopy, revealing only the presence of the starting materials even after 24 h, heating at 50 °C or further addition of 1 mol% of **1**.

## X-ray crystal structure determinations

**Table S1.** Crystallographic data for compound **4**.

|                               |                                                                                 |                                                             |                  |
|-------------------------------|---------------------------------------------------------------------------------|-------------------------------------------------------------|------------------|
| empirical formula             | C <sub>36</sub> H <sub>44</sub> F <sub>18</sub> MoN <sub>2</sub> O <sub>3</sub> | <i>V</i> (Å <sup>3</sup> )                                  | 2034.68(19)      |
| <i>M<sub>w</sub></i>          | 990.67                                                                          | <i>Z</i>                                                    | 2                |
| wavelength (Å)                | 1.54184                                                                         | $\rho_{\text{calc}}$ (Mg m <sup>-3</sup> )                  | 1.617            |
| <i>T</i> (K)                  | 100(2)                                                                          | $\mu$ (mm <sup>-1</sup> )                                   | 3.744            |
| cryst size (mm <sup>3</sup> ) | 0.20 × 0.08 × 0.05                                                              | <i>F</i> (000)                                              | 948              |
| cryst system                  | triclinic                                                                       | reflections collected                                       | 92647            |
| space group                   | <i>P</i> $\bar{1}$                                                              | indep. reflections ( <i>R</i> <sub>int</sub> )              | 8408 (0.0810)    |
| <i>a</i> (Å)                  | 11.2300(6)                                                                      | Parameters                                                  | 569              |
| <i>b</i> (Å)                  | 12.6831(6)                                                                      | Restraints                                                  | 112              |
| <i>c</i> (Å)                  | 15.8296(10)                                                                     | Goodness-of-fit on <i>F</i> <sup>2</sup>                    | 1.038            |
| $\alpha$ (°)                  | 101.495(5)                                                                      | <i>R</i> <sub>1</sub> ( <i>I</i> > 2 $\sigma$ ( <i>I</i> )) | 0.0492           |
| $\beta$ (°)                   | 110.382(6)                                                                      | <i>wR</i> <sub>2</sub> (all reflections)                    | 0.1279           |
| $\gamma$ (°)                  | 95.857(4)                                                                       | max and min $\Delta\rho$ (e Å <sup>-3</sup> )               | 0.777 and -1.421 |

**Table S2.** Crystallographic data for compound **5**.

|                               |                                                                                 |                                                             |                  |
|-------------------------------|---------------------------------------------------------------------------------|-------------------------------------------------------------|------------------|
| empirical formula             | C <sub>32</sub> H <sub>40</sub> F <sub>18</sub> MoN <sub>2</sub> O <sub>3</sub> | <i>V</i> (Å <sup>3</sup> )                                  | 1921.25(11)      |
| <i>M<sub>w</sub></i>          | 938.60                                                                          | <i>Z</i>                                                    | 2                |
| wavelength (Å)                | 1.54184                                                                         | $\rho_{\text{calc}}$ (Mg m <sup>-3</sup> )                  | 1.622            |
| <i>T</i> (K)                  | 100(2)                                                                          | $\mu$ (mm <sup>-1</sup> )                                   | 3.927            |
| cryst size (mm <sup>3</sup> ) | 0.18 × 0.15 × 0.04                                                              | <i>F</i> (000)                                              | 948              |
| cryst system                  | triclinic                                                                       | reflections collected                                       | 119615           |
| space group                   | <i>P</i> $\bar{1}$                                                              | indep. reflections ( <i>R</i> <sub>int</sub> )              | 8009 (0.0556)    |
| <i>a</i> (Å)                  | 12.5635(5)                                                                      | Parameters                                                  | 555              |
| <i>b</i> (Å)                  | 12.6072(4)                                                                      | Restraints                                                  | 98               |
| <i>c</i> (Å)                  | 12.7731(4)                                                                      | Goodness-of-fit on <i>F</i> <sup>2</sup>                    | 1.040            |
| $\alpha$ (°)                  | 88.000(2)                                                                       | <i>R</i> <sub>1</sub> ( <i>I</i> > 2 $\sigma$ ( <i>I</i> )) | 0.0318           |
| $\beta$ (°)                   | 73.097(3)                                                                       | <i>wR</i> <sub>2</sub> (all reflections)                    | 0.0833           |
| $\gamma$ (°)                  | 82.987(3)                                                                       | max and min $\Delta\rho$ (e Å <sup>-3</sup> )               | 0.793 and -0.876 |

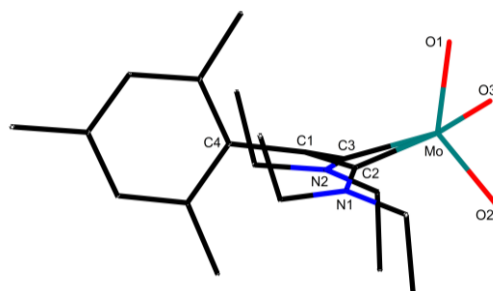

**Figure S1.** Side view of the structure of complex **5**. The (CF<sub>3</sub>)<sub>2</sub>MeC-groups and hydrogen atoms are omitted for clarity.

**Table S3.** Comparison of selected bond lengths (in Å) between complexes **4**, **5**, and **6**.

| Bond  | 4        | 5          | 6        |
|-------|----------|------------|----------|
| Mo–C2 | 2.166(3) | 2.1422(2)  | 2.202(4) |
| Mo–C3 | 2.138(3) | 2.1203(19) | 2.228(4) |
| Mo–O1 | 2.089(2) | 1.9413(14) | –        |
| Mo–O2 | 1.936(2) | 1.9084(15) | –        |
| Mo–O3 | 1.912(3) | 2.0787(15) | –        |
| C1–C2 | 1.423(5) | 1.433(3)   | 1.457(5) |
| C1–C3 | 1.413(4) | 1.413(3)   | 1.367(5) |
| C1–C4 | 1.499(4) | 1.499(3)   | 1.485(6) |
| N1–C2 | 1.323(4) | 1.324(3)   | 1.316(5) |
| N2–C3 | 1.322(4) | 1.324(3)   |          |

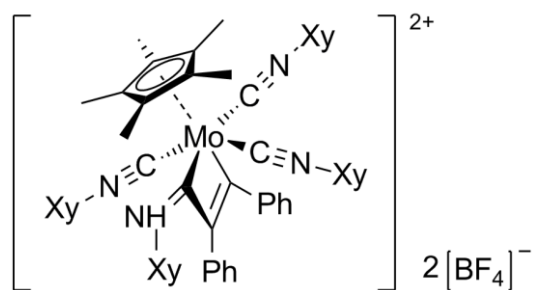

**Figure S2.** Structure of complex **6**.<sup>4</sup> Xy = 2,6-dimethylphenyl.

## NMR studies

### Variable temperature NMR spectroscopy of **4**

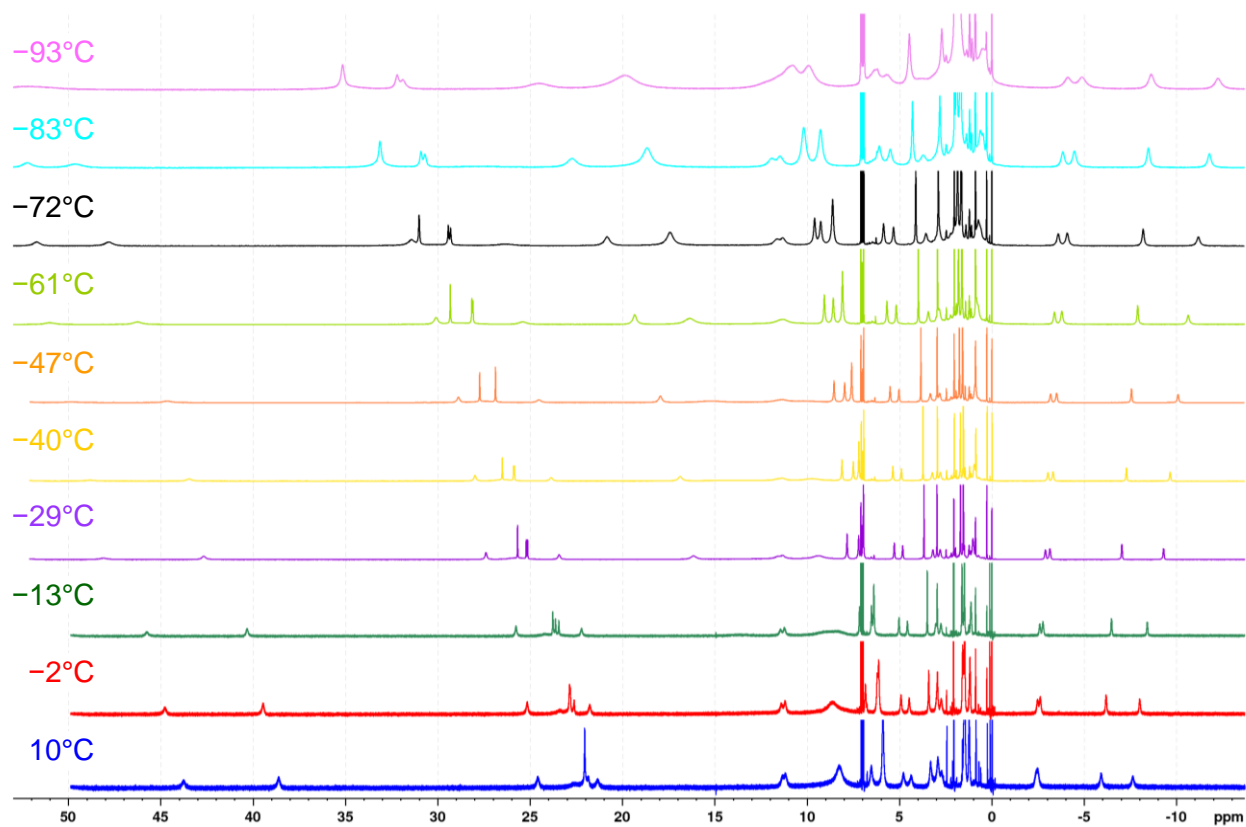

**Figure S3.** VT  $^1\text{H}$  NMR of **4** in  $\text{toluene-}d_8$ .

**Table S4.** <sup>1</sup>H NMR shifts (in ppm) of **4a** (major isomer) in toluene-*d*<sub>8</sub> at various temperatures.

| <i>T</i> (°C) | mesityl                   |                                        |                           | 4-methyl-piperidino |      |                                    |                                    | (CF <sub>3</sub> ) <sub>2</sub> (CH <sub>3</sub> )CO <sup>g</sup> |
|---------------|---------------------------|----------------------------------------|---------------------------|---------------------|------|------------------------------------|------------------------------------|-------------------------------------------------------------------|
|               | <i>m</i> -CH <sup>b</sup> | <i>o</i> -CH <sub>3</sub> <sup>a</sup> | <i>p</i> -CH <sub>3</sub> | 4-CH <sub>3</sub>   | 4-CH | 3,5-CH <sub>2</sub> <sup>c</sup>   | 2,6-CH <sub>2</sub> <sup>c</sup>   |                                                                   |
| -93           | 31.9, 32.2                | 10.8 <sup>b</sup>                      | 4.5                       | 1.8                 | 0.5  | -8.6, -4.9, —, <sup>d</sup><br>6.3 | 11.6, <sup>e</sup> 35.3,<br>51.7   | 12.3, 24.5                                                        |
| -83           | 30.7, 30.9                | 10.2 <sup>b</sup>                      | 4.3                       | 1.7                 | 0.6  | -8.5, -4.5, —, <sup>d</sup><br>6.1 | 11.5, <sup>e</sup> 33.3,<br>49.6   | 11.9, 22.7                                                        |
| -72           | 29.3, 29.4                | 9.3, 9.6                               | 4.1                       | 1.7                 | 0.7  | -8.2, -4.1, 2.9,<br>5.9            | 11.3, <sup>e</sup> 31.4,<br>47.8   | 11.6, 20.8                                                        |
| -61           | 28.1, 28.2                | 8.6, 9.1                               | 4.0                       | 1.6                 | 0.8  | -7.9, -3.8, 2.8,<br>5.7            | 11.4, <sup>e</sup> 30.1,<br>46.3   | 11.1, 19.3                                                        |
| -47           | 26.9 <sup>b</sup>         | 8.0, 8.6                               | 3.9                       | 1.6                 | 0.9  | -7.6, -3.5, 2.8,<br>5.5            | 11.4, <sup>e</sup> 28.9,<br>44.7   | 10.4, 18.0                                                        |
| -40           | 25.9, 25.9                | 7.5, 8.1                               | 3.8                       | 1.6                 | 1.0  | -7.3, -3.3, 2.8,<br>5.4            | 11.5, <sup>e,f</sup> 28.0,<br>43.5 | 9.7, 16.9                                                         |
| -29           | 25.1, 25.2                | 7.2, 7.8                               | 3.7                       | 1.5                 | 1.0  | -7.0, -3.2, 2.8,<br>5.3            | 11.4, <sup>e,f</sup> 27.4,<br>42.7 | 9.4, 16.1                                                         |
| -13           | 23.5, 23.6                | 6.5, 7.2                               | 3.5                       | 1.5                 | 1.1  | -6.5, -2.8, 2.8,<br>5.0            | 11.3, <sup>e,f</sup> 25.8,<br>40.3 | 8.7, 13.6                                                         |
| -2            | 22.6, 22.8                | 6.2, 6.9                               | 3.4                       | 1.5                 | 1.2  | -6.2, -2.6, 2.7,<br>4.9            | 11.3, <sup>e,f</sup> 25.2,<br>39.5 | 8.6, 12.7                                                         |
| 10            | 21.9, 22.1                | 6.0, 6.6                               | 3.3                       | 1.5                 | 1.3  | -5.9, -2.5, 2.7,<br>4.8            | 11.3, <sup>e,f</sup> 24.6,<br>38.6 | 8.3, — <sup>h</sup>                                               |

<sup>a</sup> Two inequivalent positions. <sup>b</sup> Overlapped resonances. <sup>c</sup> All four hydrogen atoms in these positions are diastereotopic, each resonance integrates to 2H. <sup>d</sup> One resonance is missing because of overlap. <sup>e</sup> Presumed assignment; probably two resonances (4H). <sup>f</sup> Apparent doublet. <sup>g</sup> Presumed assignments, since the integrals do not fit for all temperatures. The first resonance probably integrates to 6H, and the second probably integrates to 3H. <sup>h</sup> One resonance is not observable because of line broadening.

**Table S5.** <sup>1</sup>H NMR shifts (in ppm) of **4b** (minor isomer) in toluene-*d*<sub>8</sub> at various temperatures.

| <i>T</i> (°C) | mesityl           |                           |                           | 4-methyl-piperidino |      |                                  |                                         | (CF <sub>3</sub> ) <sub>2</sub> (CH <sub>3</sub> )-CO <sup>e</sup> |
|---------------|-------------------|---------------------------|---------------------------|---------------------|------|----------------------------------|-----------------------------------------|--------------------------------------------------------------------|
|               | <i>m</i> -CH      | <i>o</i> -CH <sub>3</sub> | <i>p</i> -CH <sub>3</sub> | 4-CH <sub>3</sub>   | 4-CH | 3,5-CH <sub>2</sub> <sup>b</sup> | 2,6-CH <sub>2</sub> <sup>c</sup>        |                                                                    |
| -93           | 35.2              | 9.9                       | 2.7                       | 2.0                 | 0.4  | -12.3, -4.1, 3.8, 5.7            | 28.7, —, <sup>d</sup> 52.7 <sup>a</sup> | 19.8                                                               |
| -83           | 33.1              | 9.3                       | 2.8                       | 1.9                 | 0.5  | -11.8, -3.9, 3.7, 5.5            | 27.6, —, <sup>d</sup> 52.2              | 18.7                                                               |
| -72           | 31.0              | 8.6                       | 2.9                       | 1.9                 | 0.6  | -11.2, -3.6, 3.6, 5.3            | 26.3, —, <sup>d</sup> 51.7              | 17.4                                                               |
| -61           | 29.3              | 8.1                       | 2.9                       | 1.8                 | 0.7  | -10.6, -3.4, 3.4, 5.2            | 25.4, 29, 51.0                          | 16.4                                                               |
| -47           | 27.8              | 7.6                       | 3.0                       | 1.8                 | 0.9  | -10.1, -3.2, 3.3, 5.0            | 24.5, 28, 49.9                          | 15.2                                                               |
| -40           | 26.5              | 7.2                       | 3.0                       | 1.7                 | 1.0  | -9.6, -3.0, 3.2, 4.9             | 23.9, 26, 48.8                          | 14.0                                                               |
| -29           | 25.6              | 7.0                       | 3.0                       | 1.7                 | 1.0  | -9.3, -2.9, 3.2, 4.8             | 23.4, 26, 48.1                          | — <sup>f</sup>                                                     |
| -13           | 23.8              | 6.4                       | 3.0                       | 1.6                 | 1.1  | -8.4, -2.6, 3.0, 4.6             | 22.2, 24, 45.8                          | — <sup>f</sup>                                                     |
| -2            | 22.9              | 6.1                       | 3.0                       | 1.6                 | 1.2  | -8.0, -2.5, 3.0, 4.5             | 21.8, 23, 44.8                          | — <sup>f</sup>                                                     |
| 10            | 22.0 <sup>a</sup> | 5.9                       | 2.9                       | 1.5                 | 1.3  | -7.6, -2.4, 2.9, 4.4             | 21.4, 22, 43.8                          | — <sup>f</sup>                                                     |

<sup>a</sup> Estimated value because of overlap. <sup>b</sup> All four hydrogen atoms in these positions are diastereotopic, each resonance integrates to 2H. <sup>c</sup> Presumed assignments because of overlap. Four resonances are expected because of the diastereotopic hydrogen atoms in these positions: Two resonances (2 × 2H) can be easily identified, whereas the other two are very broad and overlap with themselves and other resonances; an estimate of the chemical shift is given here in italics. <sup>d</sup> One resonance is missing because of overlap. <sup>e</sup> Presumed assignments, since the integral do not fit for all temperatures. <sup>f</sup> Resonance not observable because of line broadening.

NMR spectra of **4** at -29 °C

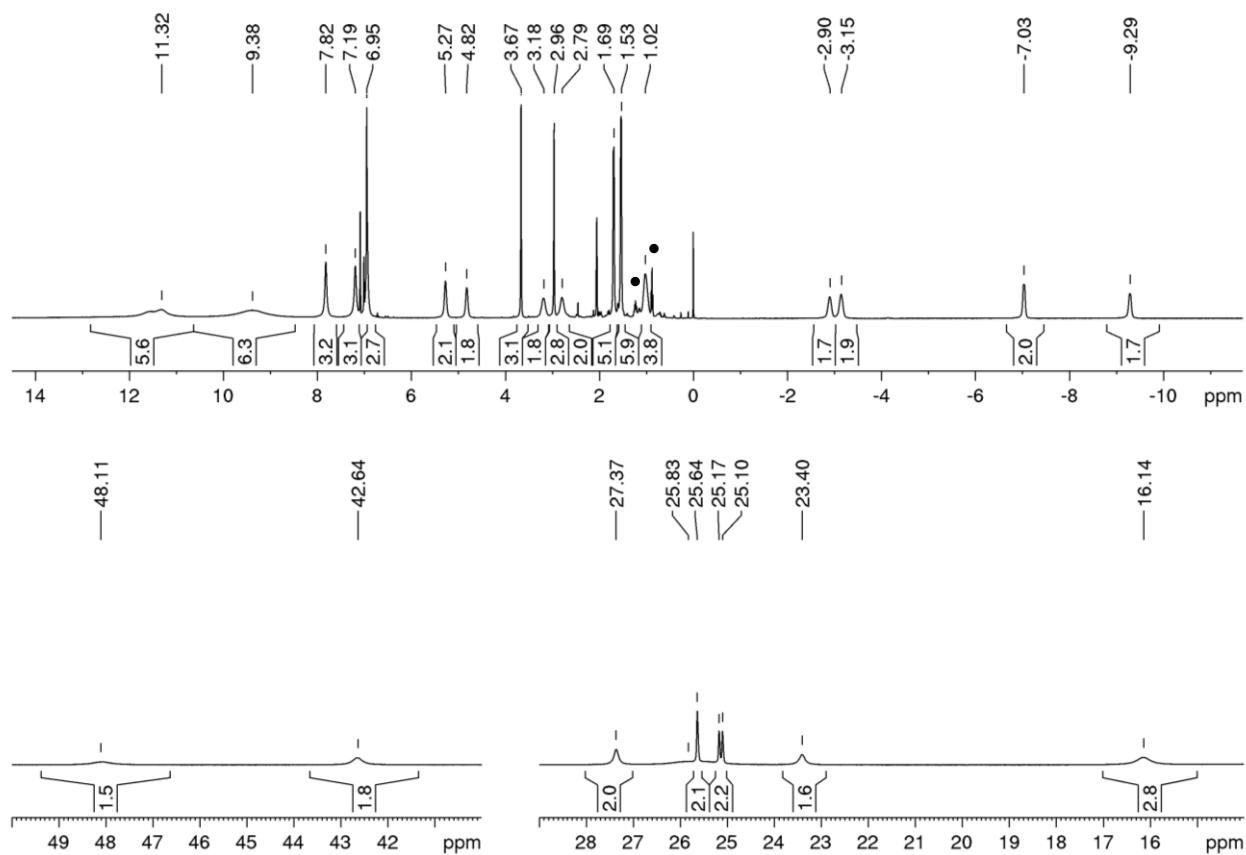

**Figure S4.** <sup>1</sup>H NMR spectrum (divided in three segments) of **4** at -29 °C in toluene-*d*<sub>8</sub>.

• = pentane.

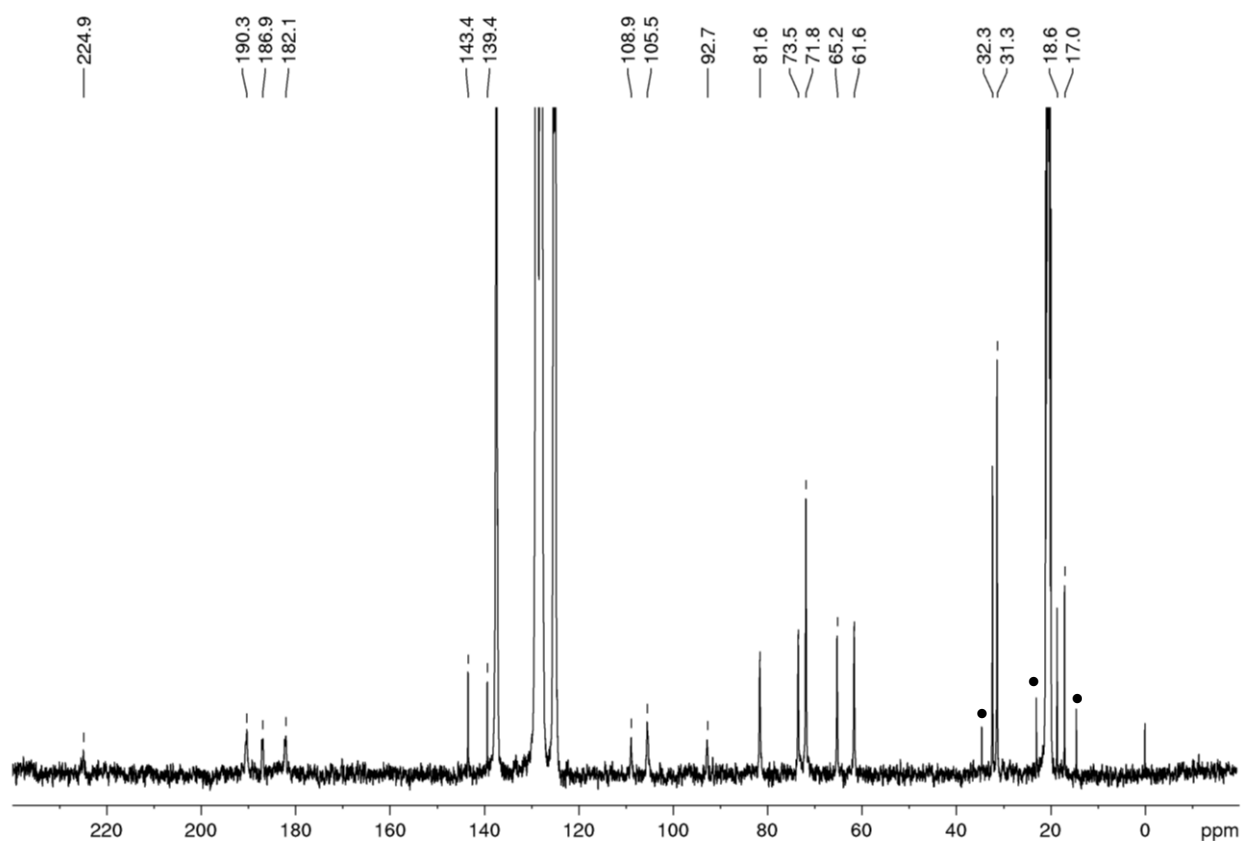

**Figure S5.**  $^{13}\text{C}\{^1\text{H}\}$  NMR spectrum of **4** at  $-29\text{ }^{\circ}\text{C}$  in toluene- $d_6$ . • = pentane.

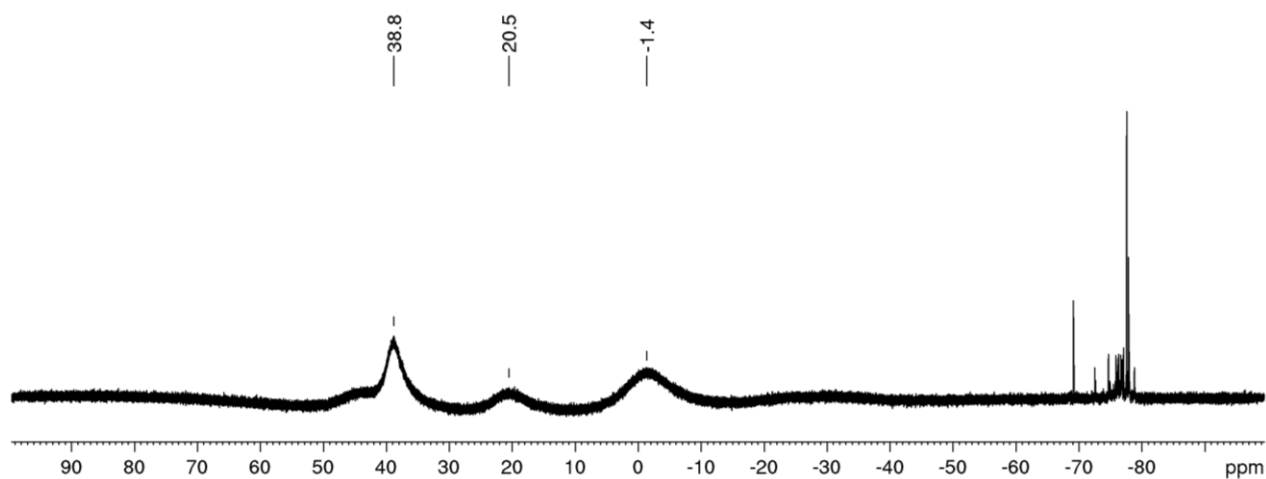

**Figure S6.**  $^{19}\text{F}\{^1\text{H}\}$  NMR spectrum of **4** at  $-29\text{ }^{\circ}\text{C}$  in toluene- $d_6$ . The signals around  $-70\text{ ppm}$  and  $-80\text{ ppm}$  correspond to small amounts of decomposition products.

Stereoisomers of **4**

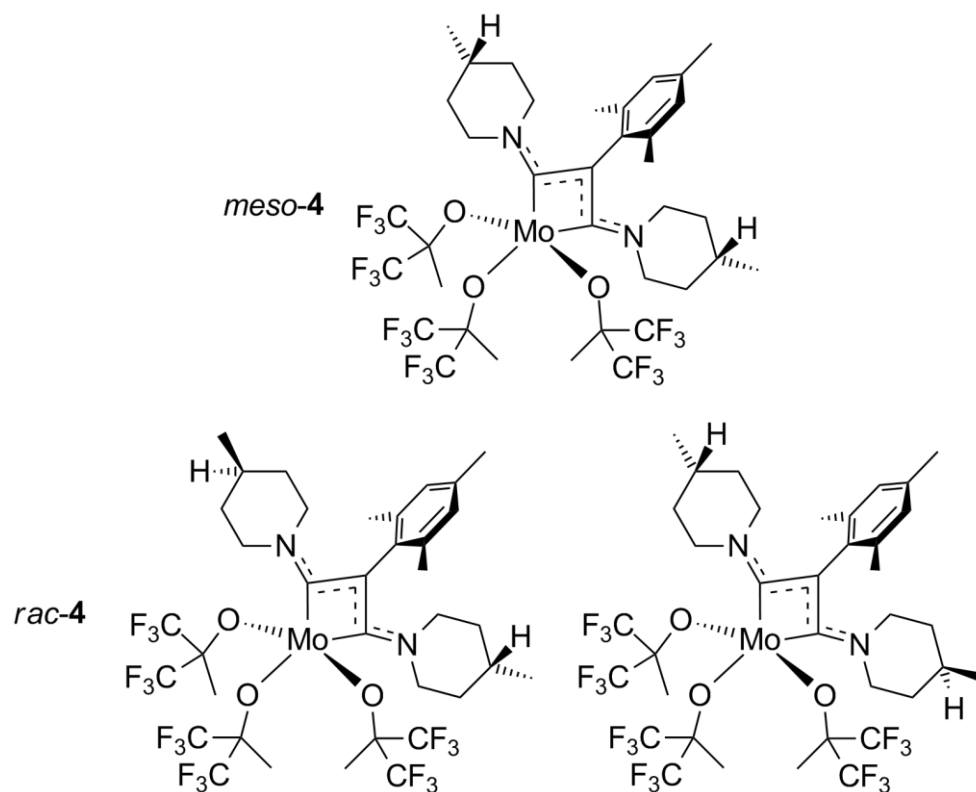

**Figure S7.** Stereoisomers of compound **4**.

# Variable temperature NMR spectroscopy of **5**

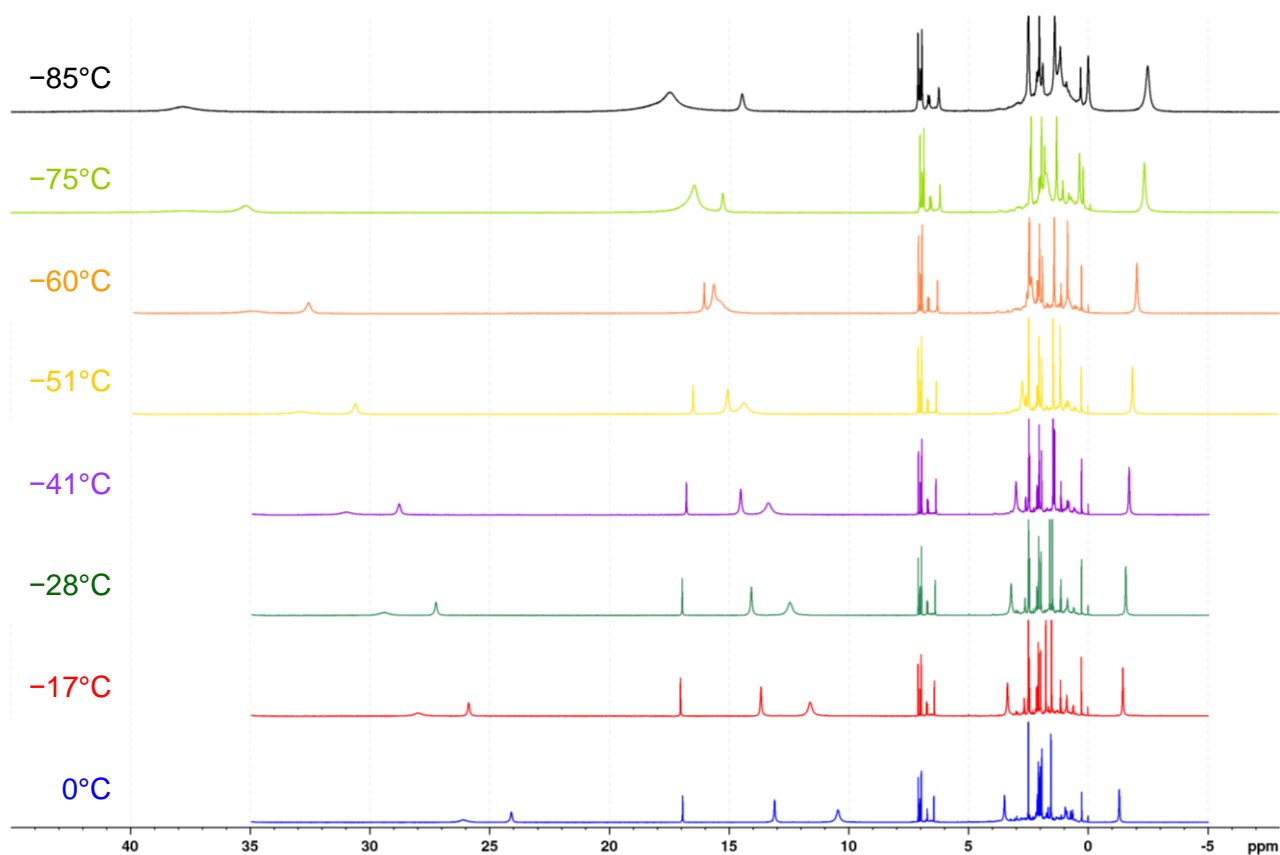

**Figure S8.** VT  $^1\text{H}$  NMR of **5** in toluene- $d_8$ .

**Table S6.**  $^1\text{H}$  NMR shifts (in ppm) of **5** in toluene- $d_8$  at various temperatures.

| $T$ ( $^{\circ}\text{C}$ ) | mesityl       |                 |                 | diethylamino  |               | $(\text{CF}_3)_2(\text{CH}_3)\text{CO}$ |
|----------------------------|---------------|-----------------|-----------------|---------------|---------------|-----------------------------------------|
|                            | $m\text{-CH}$ | $o\text{-CH}_3$ | $p\text{-CH}_3$ | $\text{CH}_3$ | $\text{CH}_2$ |                                         |
| -85                        | 14.4          | 1.2             | 0.0             | 17.5, -2.5    | 40.4, 37.8    | 18.0                                    |
| -75                        | 15.3          | 1.8             | 0.5             | 16.5, -2.3    | 37.7, 35.2    | 16.9                                    |
| -60                        | 16.0          | 2.4             | 0.9             | 15.6, -2.0    | 34.9, 32.6    | 15.4                                    |
| -51                        | 16.5          | 2.7             | 1.2             | 15.0, -1.9    | 32.9, 30.6    | 14.4                                    |
| -41                        | 16.8          | 3.0             | 1.4             | 14.5, -1.7    | 31.0, 28.8    | 13.4                                    |
| -28                        | 17.0          | 3.2             | 1.6             | 14.1, -1.6    | 29.4, 27.3    | 12.5                                    |
| -17                        | 17.0          | 3.4             | 1.8             | 13.7, -1.5    | 28.0, 25.9    | 11.6                                    |
| 0                          | 16.9          | 3.5             | 1.9             | 13.1, -1.3    | 26.1, 24.1    | 10.4                                    |

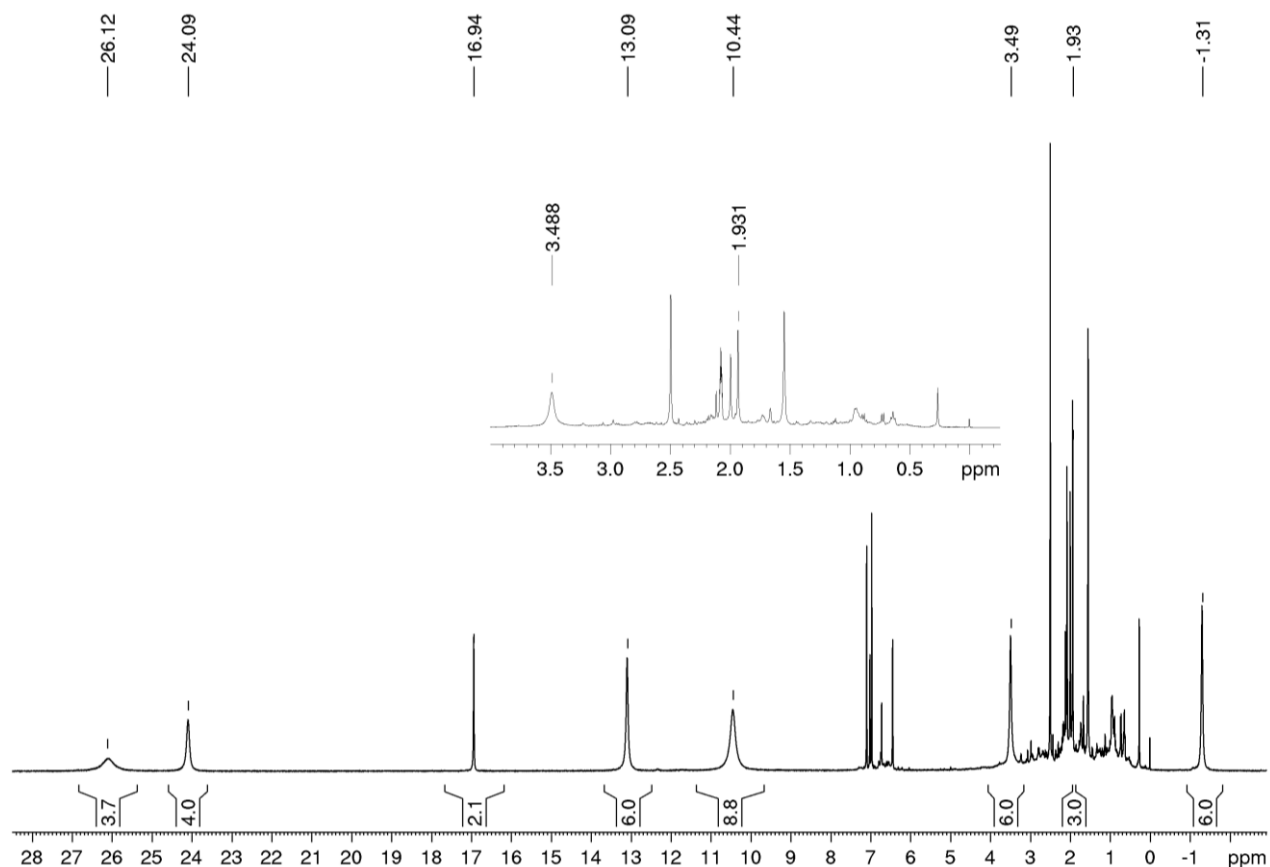

**Figure S9.**  $^1\text{H}$  NMR spectrum of **5** at 0 °C in toluene- $d_8$ . Only the paramagnetic resonances are highlighted. The segment between 0 ppm and 4 ppm is amplified for clarity.

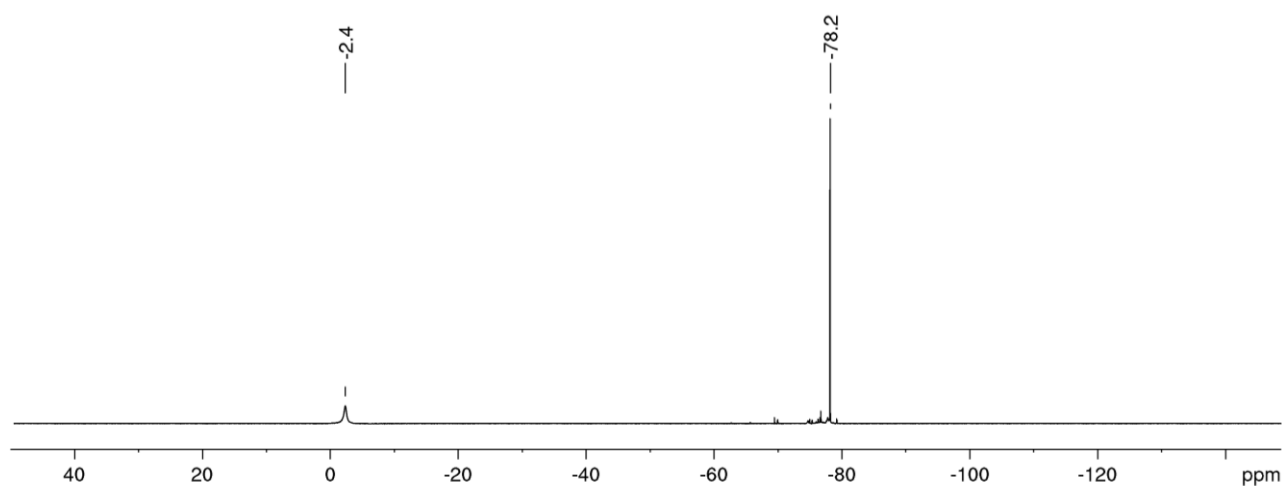

**Figure S10.**  $^{19}\text{F}\{^1\text{H}\}$  NMR spectrum of **5** at 0 °C in toluene- $d_8$ . The signal at -78.2 ppm corresponds either to complex **1** or to the side product **16**.

## Solid-state magnetic susceptibility studies

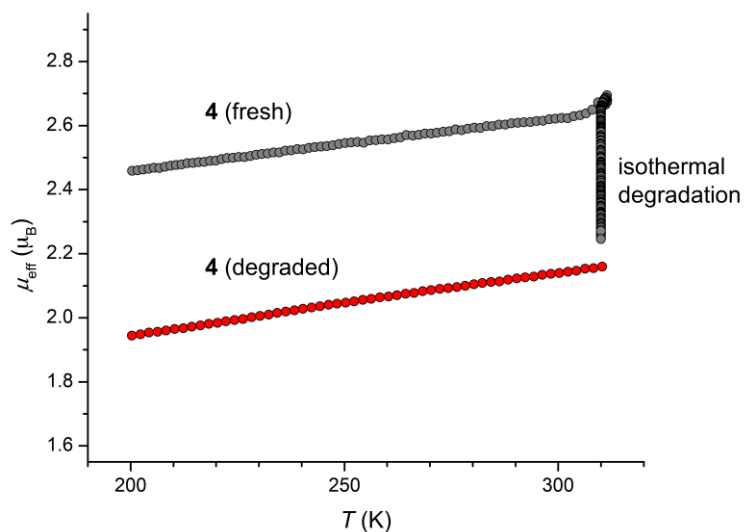

**Figure S11.** Effective magnetic moment ( $\mu_{\text{eff}}$ ) vs.  $T$  plots for complex 4 before (dark grey) and after (red) isothermal degradation at  $T = 310$  K, measured with an externally applied magnetic field of  $B_{\text{ext}} = 0.1$  T.

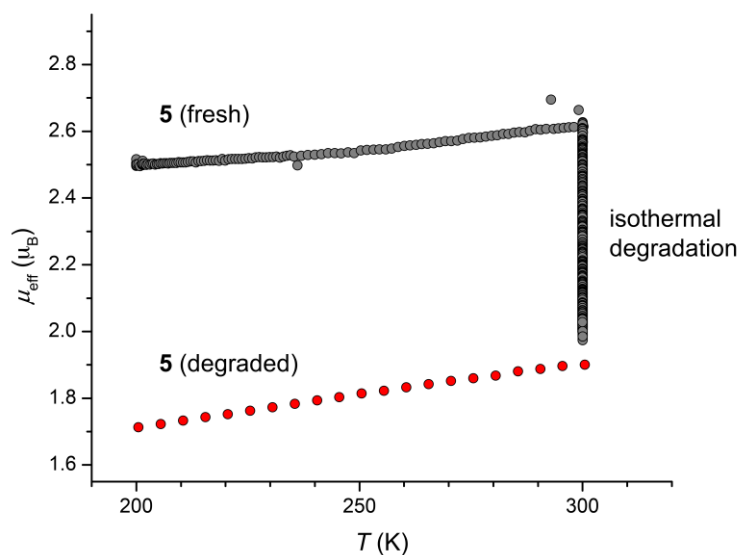

**Figure S12.** Effective magnetic moment ( $\mu_{\text{eff}}$ ) vs.  $T$  plots for complex 5 before (dark grey) and after (red) isothermal degradation at  $T = 300$  K, measured with an externally applied magnetic field of  $B_{\text{ext}} = 0.1$  T.

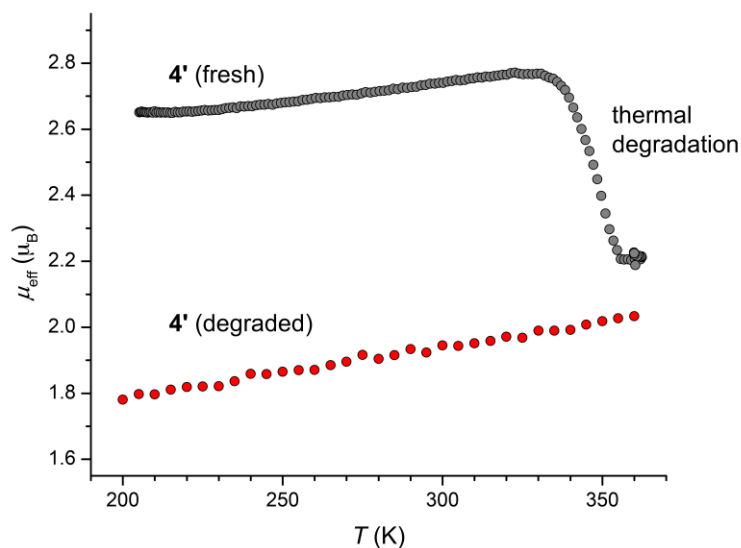

**Figure S13.** Effective magnetic moment ( $\mu_{\text{eff}}$ ) vs.  $T$  plots for complex **4'** before (dark grey) and after (red) thermal degradation above  $T = 300$  K, measured with an externally applied magnetic field of  $B_{\text{ext}} = 0.1$  T.

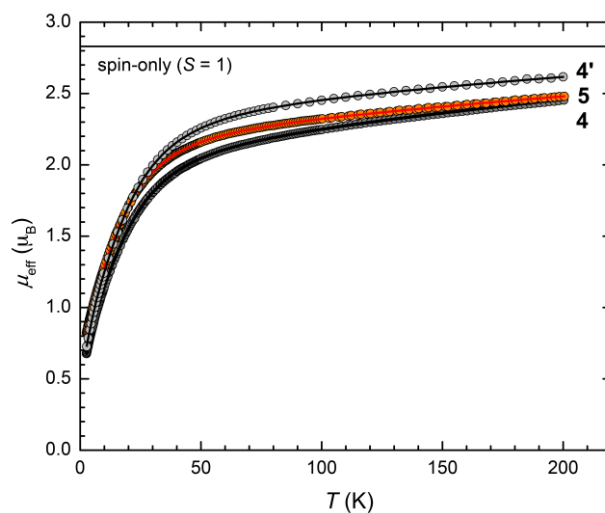

**Figure S14.** Effective magnetic moment ( $\mu_{\text{eff}}$ ) vs.  $T$  plots for complexes **4** (dark grey), **4'** (grey) and **5** (orange) measured with an externally applied magnetic field of  $B_{\text{ext}} = 0.1$  T; symbols: experimental data; lines: fit on the basis of a modified spin Hamiltonian approach (see article main text).

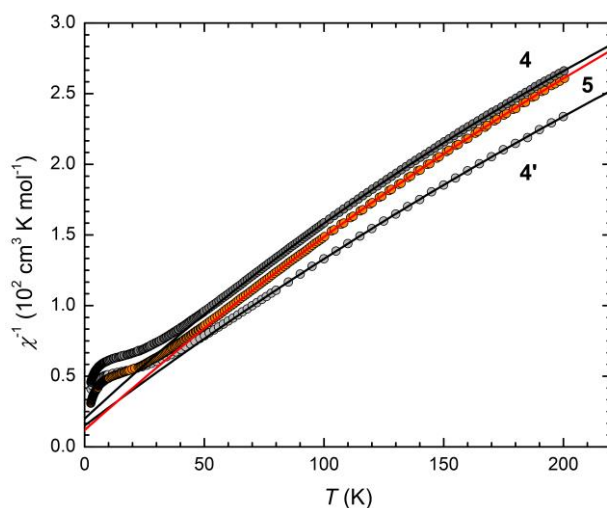

**Figure S15.** Inverse magnetic susceptibility ( $\chi^{-1}$ ) vs.  $T$  plots for complexes **4** (dark grey), **4'** (grey) and **5** (orange) measured with an externally applied magnetic field of  $B_{\text{ext}} = 0.1$  T; symbols: experimental data; lines: fit on the basis of the model described in eq. 1.

**Table S7.** Parameters determined on the basis of different Curie-Weiss models (cf. eq. 1) with (I)  $D_{\text{TIP}} = 0$ ; (II)  $D_{\text{TIP}}$  values taken from Table S8; (III) with  $D_{\text{TIP}}$  as a free fit parameter.

| model | compound  | $C$ ( $\text{cm}^3 \text{K mol}^{-1}$ ) | $\theta$ (K) | $D_{\text{TIP}}$ ( $10^{-4} \text{cm}^3 \text{mol}^{-1}$ ) | $\mu_{\text{eff}}$ ( $\mu_{\text{B}}$ ) |
|-------|-----------|-----------------------------------------|--------------|------------------------------------------------------------|-----------------------------------------|
| I     | <b>4</b>  | 0.893(4)                                | -41.0(7)     | 0 <sup>a</sup>                                             | 2.67                                    |
|       | <b>4'</b> | 0.972(5)                                | -29.1(9)     | 0 <sup>a</sup>                                             | 2.79                                    |
|       | <b>5</b>  | 0.866(3)                                | -28.3(6)     | 0 <sup>a</sup>                                             | 2.63                                    |
| II    | <b>4</b>  | 0.607(1)                                | -9.9(1)      | 9.63 <sup>a</sup>                                          | 2.20                                    |
|       | <b>4'</b> | 0.764(1)                                | -10.2(1)     | 7.16 <sup>a</sup>                                          | 2.47                                    |
|       | <b>5</b>  | 0.667(1)                                | -8.5(1)      | 6.92 <sup>a</sup>                                          | 2.30                                    |
| III   | <b>4</b>  | 0.633(2)                                | -12.4(2)     | 8.8(6)                                                     | 2.25                                    |
|       | <b>4'</b> | 0.780(7)                                | -11.6(6)     | 6.6(2)                                                     | 2.50                                    |
|       | <b>5</b>  | 0.658(4)                                | -7.7(4)      | 7.21(13)                                                   | 2.29                                    |

<sup>a</sup> Parameter was fixed in the simulation.

**Table S8.** Zero-field splitting parameters determined on the basis of a modified spin Hamiltonian approach as described in the article main text.  $V_{\text{IMP}}$  denotes the volume fraction of a paramagnetic ( $S = 1/2$ ) impurity.<sup>a</sup>

| compound  | $ D $ (cm <sup>-1</sup> ) | $E/D$ (cm <sup>-1</sup> ) <sup>b</sup> | $g$ (1) | $D_{\text{TIP}}$ (10 <sup>-4</sup> cm <sup>3</sup> mol <sup>-1</sup> ) | $V_{\text{IMP}}$ |
|-----------|---------------------------|----------------------------------------|---------|------------------------------------------------------------------------|------------------|
| <b>4</b>  | 55.0                      | 0                                      | 1.487   | 9.63                                                                   | 5.3%             |
| <b>4'</b> | 56.1                      | 0                                      | 1.687   | 7.16                                                                   | 5.1%             |
| <b>5</b>  | 49.8                      | 0                                      | 1.596   | 6.92                                                                   | 10.4%            |

<sup>a</sup> The determined  $g$  values of this analysis are unexpectedly small ( $g_{\text{av}} = 1.487$ – $1.687$ ) and cannot be physically explained. Most probably, this is a consequence of either weighing errors, partially sample decomposition or the presence of spin-orbit coupling. Therefore, although the simulation of the temperature-dependent effective magnetic moment resulted in an excellent agreement with the experimental data, we would like to stress that the obtained ZFS parameters of this analysis represent only an estimate with a relatively large uncertainty.

<sup>b</sup> The rhombic ZFS parameter  $E/D$  was fixed in the simulation ( $E/D = 0$ ) because the free fit resulted in implausible values for  $E/D$  that strongly depend on the selection of the starting value.

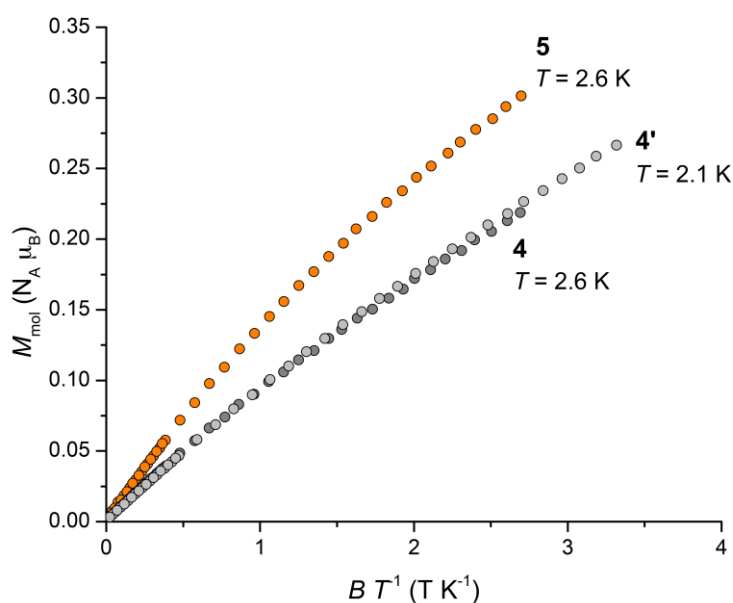

**Figure S16.** Magnetic field-dependent molar magnetisation ( $M_{\text{mol}}$ ) for complexes **4** (dark grey), **4'** (grey) and **5** (orange) measured with an externally applied magnetic field between  $B_{\text{ext}} = 0.05$  and 7 T at  $T = 2.1$  or 2.6 K.

### Decomposition studies

The magnetic measurements allowed the study of the decomposition of **4** and **5** by increasing the temperature above 300 K, giving a half-life of  $t_{1/2} = 287$  min (**4**,  $T = 310$  K) and  $t_{1/2} = 138$  min (**5**,  $T = 300$  K) (Figures S16–S17). Interestingly, a magnetic moment of about  $2 \mu_B$ , typically found for  $S = 1/2$  systems, was still observed even after the sealed samples were kept several days at room temperature. This would imply a Mo(v)  $d^1$  species, but all attempts to identify the decomposed substances have failed so far.

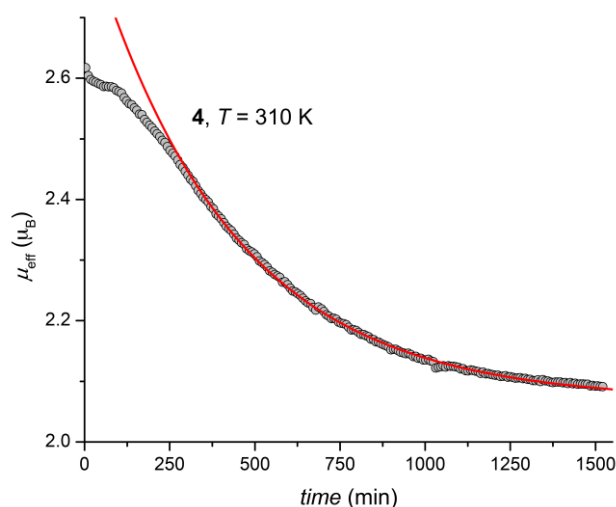

**Figure S17.** Effective magnetic moment ( $\mu_{\text{eff}}$ ) vs. *time* plots for complex **4** measured with an externally applied magnetic field of  $B_{\text{ext}} = 0.1$  T at  $T = 310$  K; symbols: experimental data; line: fit on the basis of an exponential decay model.

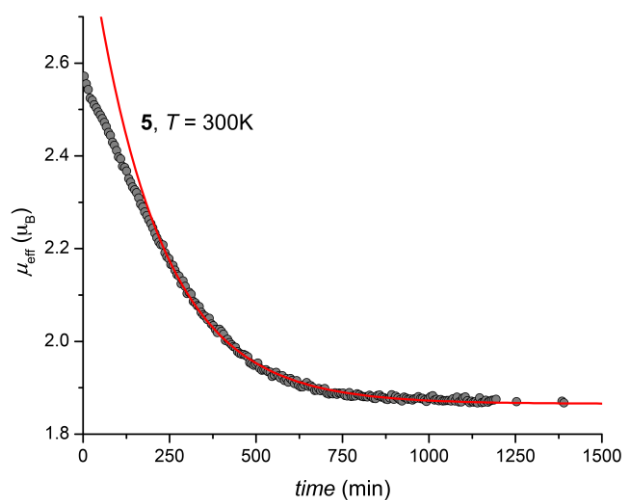

**Figure S18.** Effective magnetic moment ( $\mu_{\text{eff}}$ ) vs. *time* plots for complex **5** measured with an externally applied magnetic field of  $B_{\text{ext}} = 0.1$  T at  $T = 300$  K; symbols: experimental data; line: fit on the basis of an exponential decay model.

## Computational studies

**Table S9.** Absolute electronic and thermodynamic data computed at the B3LYP/6-311G(d,p) level of theory. For some compounds both the singlet and the triplet state were calculated. All values are given in atomic units (Hartree).

| Compound   | $E_0$        | $E_{298}$    | $H_{298}$    | $G_{298}$    |
|------------|--------------|--------------|--------------|--------------|
| 1 (S = 0)  | -2941.962110 | -2941.915320 | -2941.914376 | -2942.048310 |
| 2 (S = 0)  | -657.193316  | -657.176493  | -657.175549  | -657.239643  |
| 3 (S = 0)  | -502.381096  | -502.364890  | -502.363946  | -502.427100  |
| 4 (S = 0)  | -3599.190659 | -3599.127148 | -3599.126203 | -3599.294018 |
| 4 (S = 1)  | -3599.206587 | -3599.142738 | -3599.141794 | -3599.312276 |
| 5 (S = 0)  | -3444.366056 | -3444.303738 | -3444.302794 | -3444.468414 |
| 5 (S = 1)  | -3444.38725  | -3444.324866 | -3444.323922 | -3444.489241 |
| I1 (S = 0) | -3599.176261 | -3599.112922 | -3599.111978 | -3599.278569 |
| I1 (S = 1) | -3599.180596 | -3599.117320 | -3599.116375 | -3599.284725 |
| I2 (S = 0) | -716.200088  | -716.180936  | -716.179991  | -716.249307  |
| I3 (S = 0) | -2882.976335 | -2882.931941 | -2882.930997 | -2883.061185 |
| I4 (S = 0) | -3444.354782 | -3444.293001 | -3444.292056 | -3444.453644 |
| I4 (S = 1) | -3444.360986 | -3444.298665 | -3444.297721 | -3444.462846 |
| I5 (S = 0) | -638.793451  | -638.774376  | -638.773431  | -638.844988  |
| I6 (S = 0) | -2805.570664 | -2805.526542 | -2805.525598 | -2805.655702 |
| I7 (S = 0) | -3599.125298 | -3599.061767 | -3599.060823 | -3599.225748 |
| 1N (S = 0) | -3658.158959 | -3658.093091 | -3658.092147 | -3658.264554 |
| 1N (S = 1) | -3658.172199 | -3658.105959 | -3658.105014 | -3658.279044 |
| 3N (S = 0) | -3540.195009 | -3540.134223 | -3540.133279 | -3540.294687 |
| 3N (S = 1) | -3540.212153 | -3540.151028 | -3540.150084 | -3540.313764 |

**Table S10.** Relative electronic and thermodynamic data computed at the B3LYP/6-311G(d,p) level of theory. All values are given in kcal mol<sup>-1</sup>.

| Compound   | $\Delta E_0$ | $\Delta E_{298}$ | $\Delta H_{298}$ | $\Delta G_{298}$ |
|------------|--------------|------------------|------------------|------------------|
| 4 (S = 0)  | 9.99         | 9.78             | 9.78             | 11.46            |
| 4 (S = 1)  | 0.00         | 0.00             | 0.00             | 0.00             |
| I1 (S = 0) | 19.03        | 18.71            | 18.71            | 21.15            |
| I1 (S = 1) | 16.31        | 15.95            | 15.95            | 17.29            |
| I7 (S = 0) | 51.01        | 50.81            | 50.81            | 54.30            |

**Table S11.** Relative electronic and thermodynamic data computed at the B3LYP/6-311G(d,p) level of theory. All values are given in kcal mol<sup>-1</sup>.

| Compound or reaction                                                   | $\Delta E_0$ | $\Delta E_{298}$ | $\Delta H_{298}$ | $\Delta G_{298}$ |
|------------------------------------------------------------------------|--------------|------------------|------------------|------------------|
| <b>1</b> (S = 0) + <b>2</b> (S = 0) [ + <b>2</b> (S = 0)]              | 0.00         | 0.00             | 0.00             | 0.00             |
| <b>I1</b> (S = 1) [ + <b>2</b> (S = 0)]                                | -15.79       | -16.01           | -16.60           | 2.03             |
| <b>I2</b> (S = 0) + <b>I3</b> (S = 0) [ + <b>2</b> (S = 0)]            | -13.18       | -13.22           | -13.22           | -14.14           |
| <b>4</b> (S = 1) [ + <b>2</b> (S = 0)]                                 | -32.10       | -31.96           | -32.55           | -15.26           |
| 0.5 <b>3N</b> (S = 1) + 0.5 <b>1N</b> (S = 1)<br>[ + <b>2</b> (S = 0)] | -23.06       | -23.02           | -23.61           | -5.30            |
| <b>3N</b> (S = 1) + <b>I2</b> (S = 0)                                  | -39.85       | -39.95           | -40.45           | -22.26           |
| <b>I7</b> (S = 0) [ + <b>2</b> (S = 0)]                                | 18.91        | 18.85            | 18.26            | 39.03            |

**Table S12.** Relative electronic and thermodynamic data computed at the B3LYP/6-311G(d,p) level of theory. All values are given in kcal mol<sup>-1</sup>.

| Compound          | $\Delta E_0$ | $\Delta E_{298}$ | $\Delta H_{298}$ | $\Delta G_{298}$ |
|-------------------|--------------|------------------|------------------|------------------|
| <b>5</b> (S = 0)  | 13.30        | 13.26            | 13.26            | 13.07            |
| <b>5</b> (S = 1)  | 0.00         | 0.00             | 0.00             | 0.00             |
| <b>I4</b> (S = 0) | 20.37        | 20.00            | 20.00            | 22.34            |
| <b>I4</b> (S = 1) | 16.48        | 16.44            | 16.44            | 16.56            |

**Table S13.** Relative electronic and thermodynamic data computed at the B3LYP/6-311G(d,p) level of theory. All values are given in kcal mol<sup>-1</sup>.

| Compound or reaction                  | $\Delta E_0$ | $\Delta E_{298}$ | $\Delta H_{298}$ | $\Delta G_{298}$ |
|---------------------------------------|--------------|------------------|------------------|------------------|
| <b>1</b> (S = 0) + <b>3</b> (S = 0)   | 0.00         | 0.00             | 0.00             | 0.00             |
| <b>I4</b> (S = 1)                     | -11.16       | -11.58           | -12.17           | 7.88             |
| <b>I5</b> (S = 0) + <b>I6</b> (S = 0) | -13.12       | -12.99           | -12.99           | -15.86           |
| <b>5</b> (S = 1)                      | -27.64       | -28.02           | -28.61           | -8.68            |

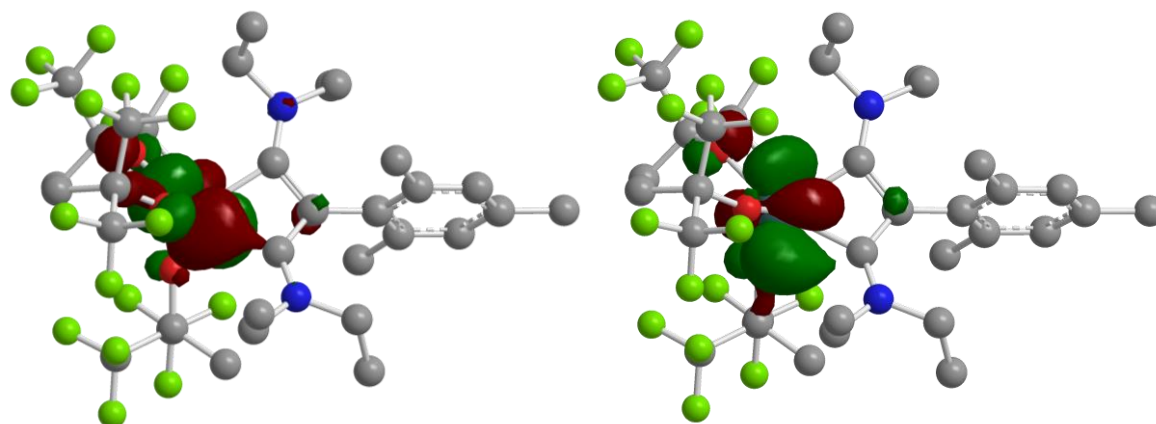

**Figure S19.** Contour plots (isovalue = 0.40) of the biorthogonalised SOMO (left) and SOMO-1 (right) of complex **5**.

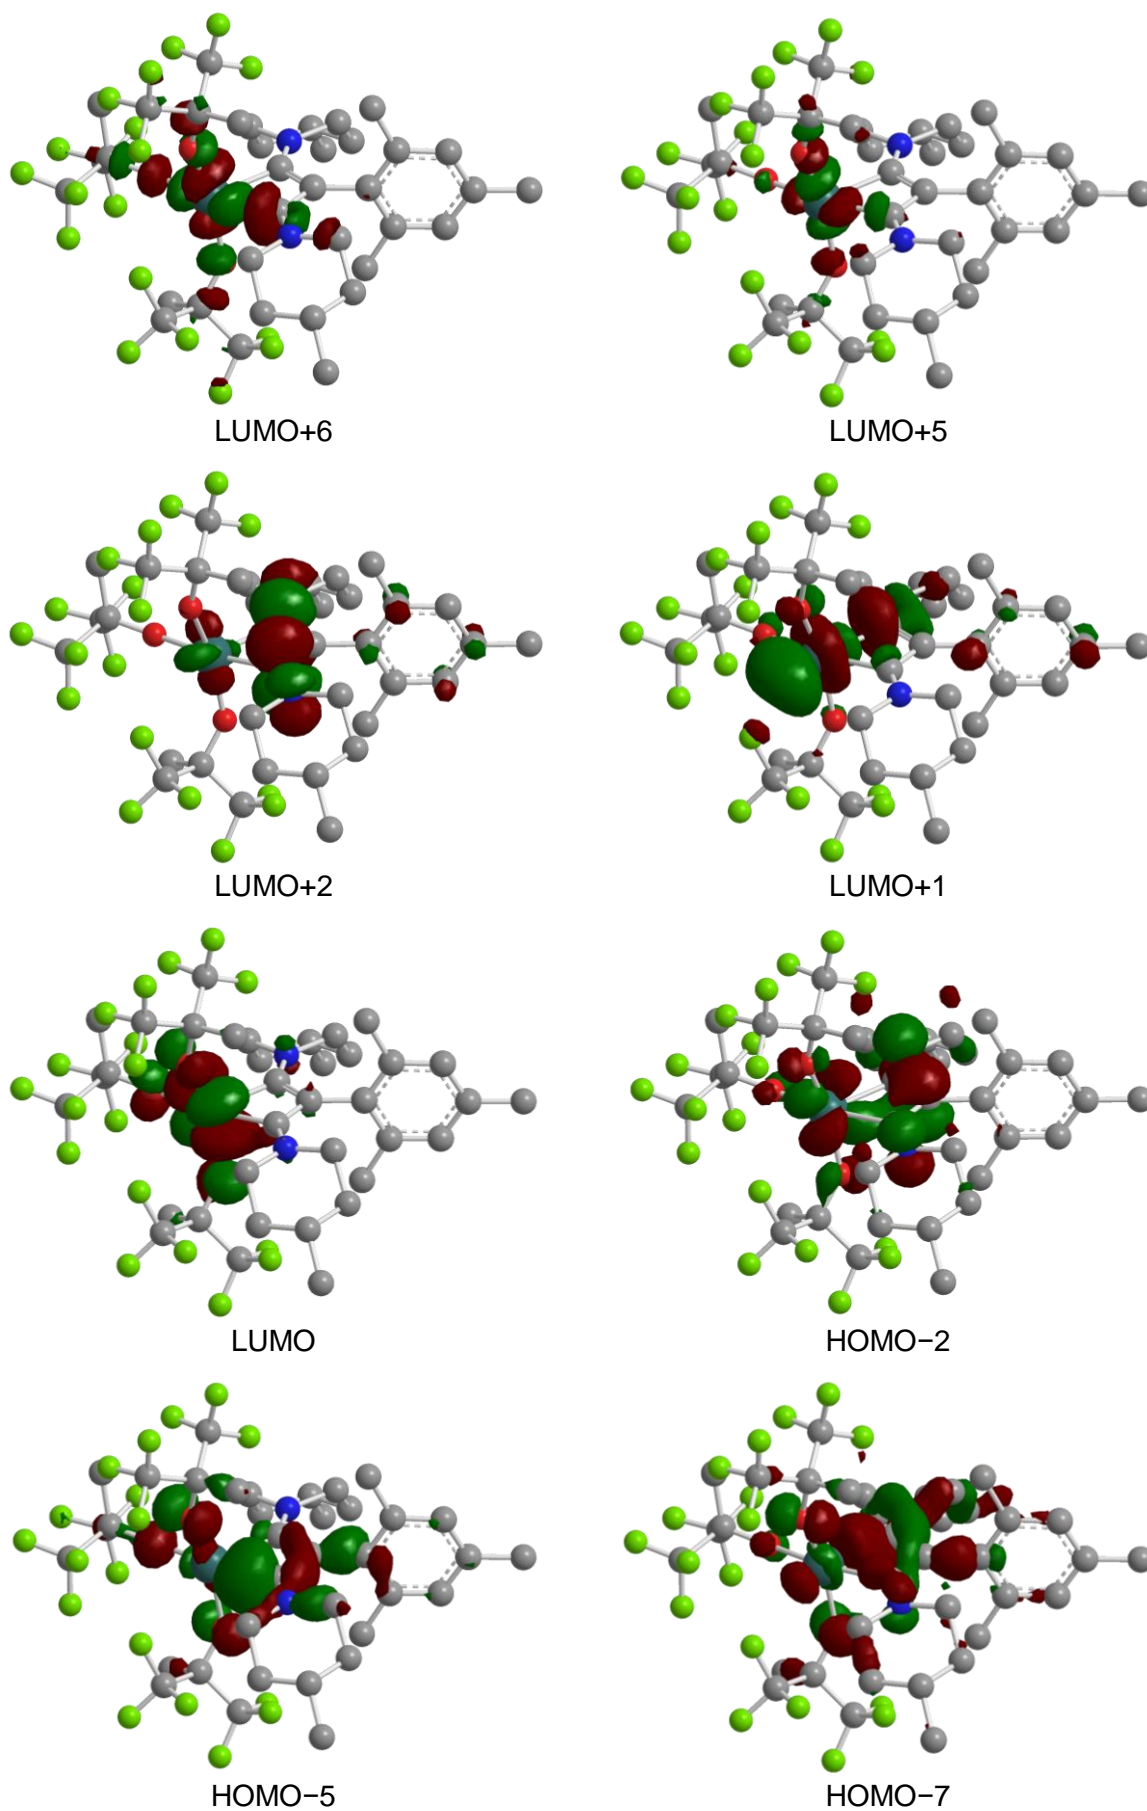

**Figure S20.** Contour plots (isovalue = 0.40) of selected molecular orbitals of complex 4.

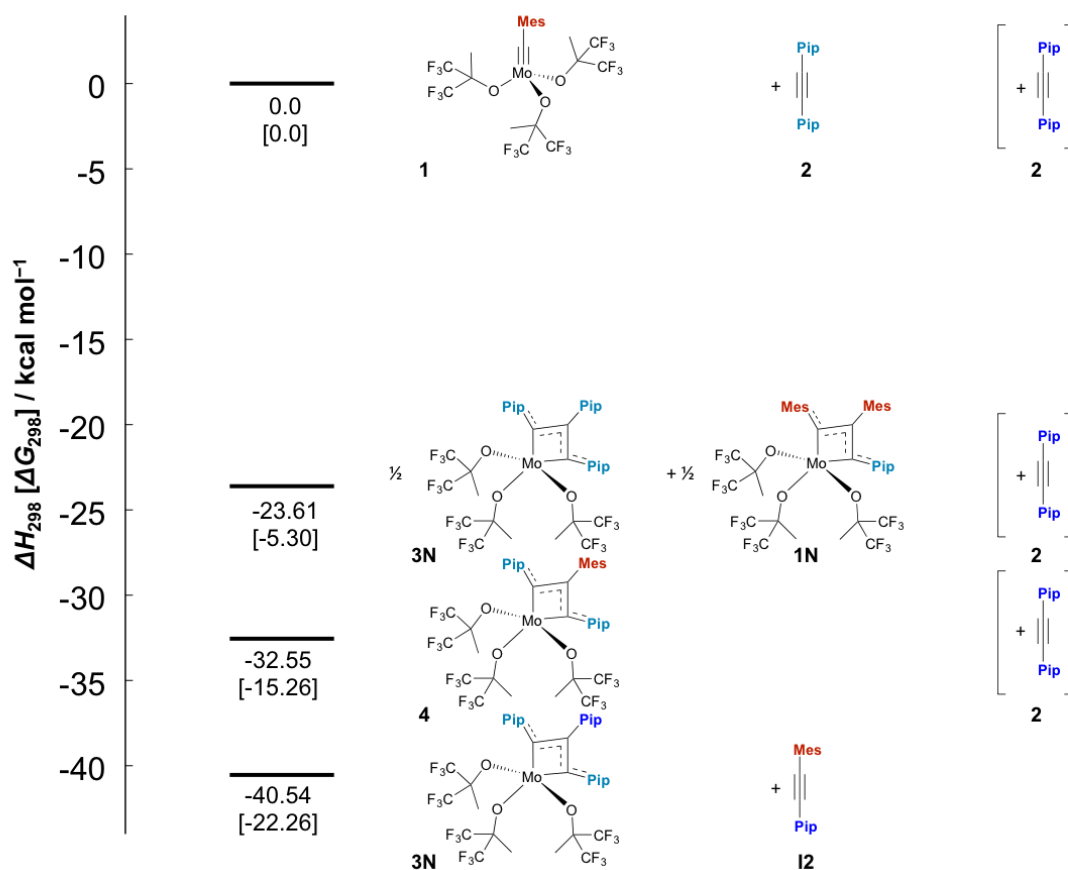

**Figure S21.** Relative reaction enthalpies/free energies of possible products of the reaction of **1** with either one or two equivalents of **2**. The formation of the triaminospecies **3N** is thermodynamically preferred only in the presence of two equivalents of **2**, whereas the diaminospecies is preferred in the presence of only one equivalent of **2**.

## References

1. A. R. Petrov, C. G. Daniliuc, P. G. Jones and M. Tamm, *Chem. Eur. J.*, 2010, **16**, 11804–11808.
2. G. Himbert, H. Naßhan and S. Kosack, *Synlett*, 1991, 117–118.
3. S. R. Klopfenstein, C. Kluwe, K. Kirschbaum and J. A. Davies, *Can. J. Chem.*, 1996, **74**, 2331–2339.
4. C. J. Adams, K. M. Anderson, I. M. Bartlett, N. G. Connelly, Orpen, A. Guy, T. J. Paget, H. Phetmung and D. W. Smith, *J. Chem. Soc., Dalton Trans.*, 2001, 1284–1292.
